# Supplementary material for: Evaluating the Sampling Design of a Long-Term Community-Based Estuary Monitoring Program
Source: MDPI journal article supplement (doi:10.3390/fishes6030027), 2021-08-02
Supplement: s1 [file s1]

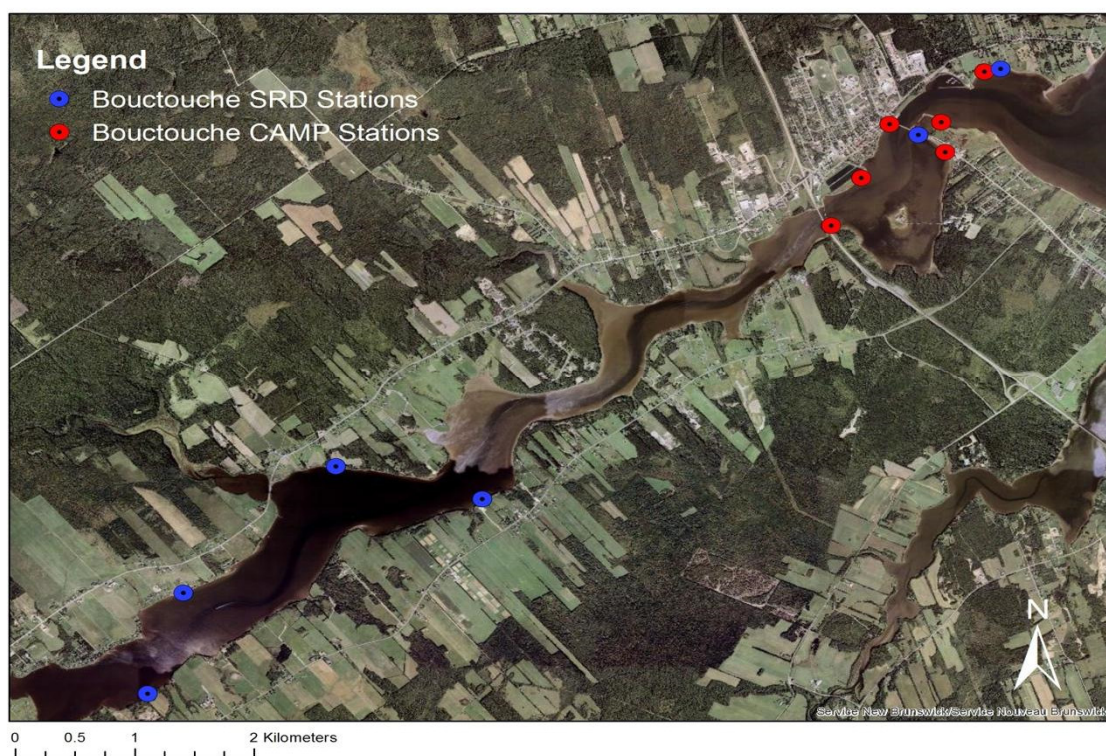

Figure S1. Map of Bouctouche station locations.

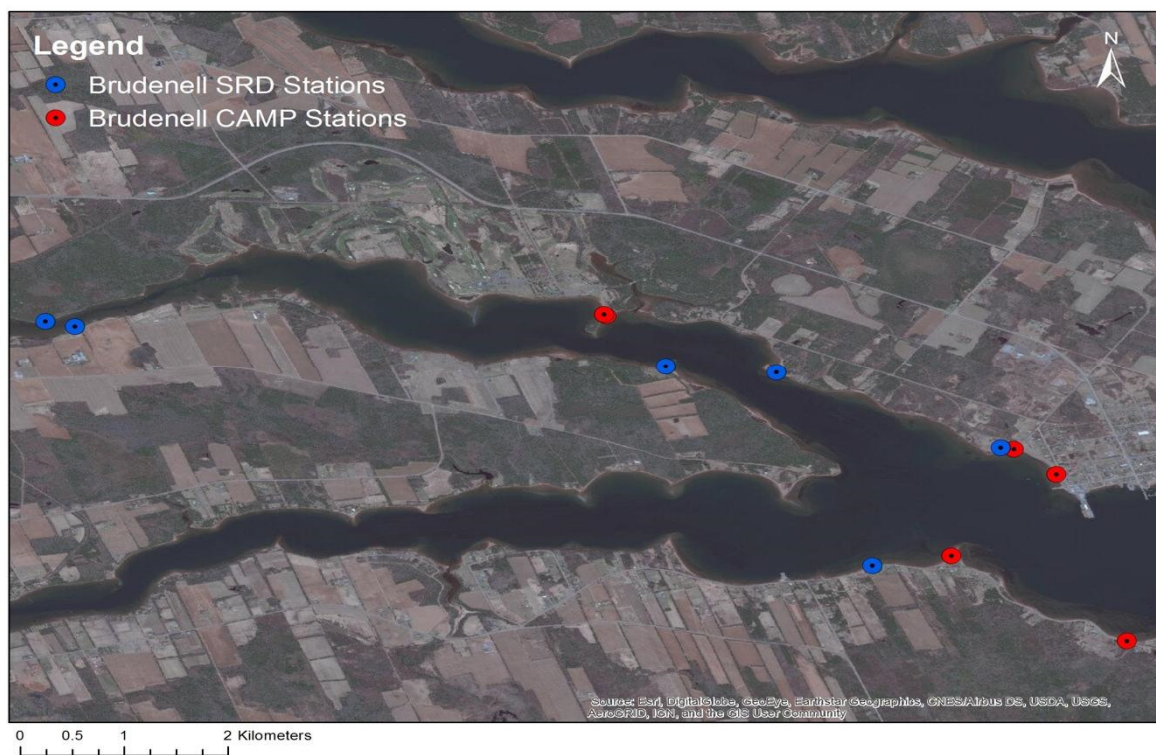

Figure S2. Map of Brudenell station locations.



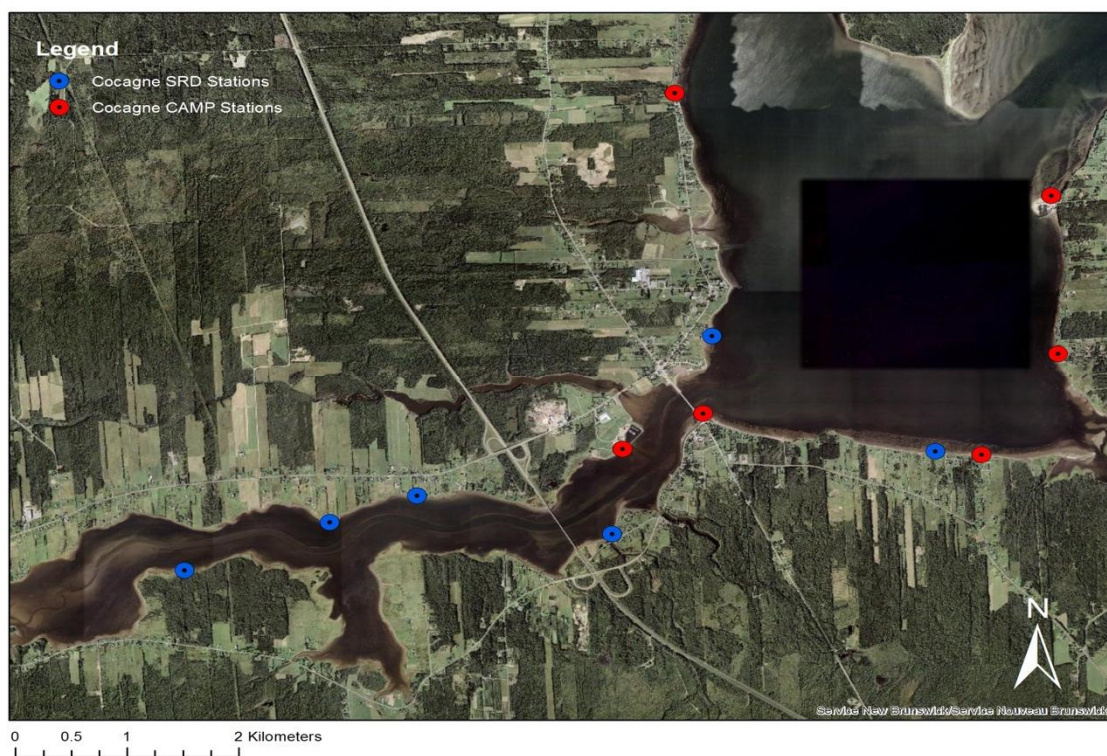

**Figure S3.** Map of Cocagne station locations.

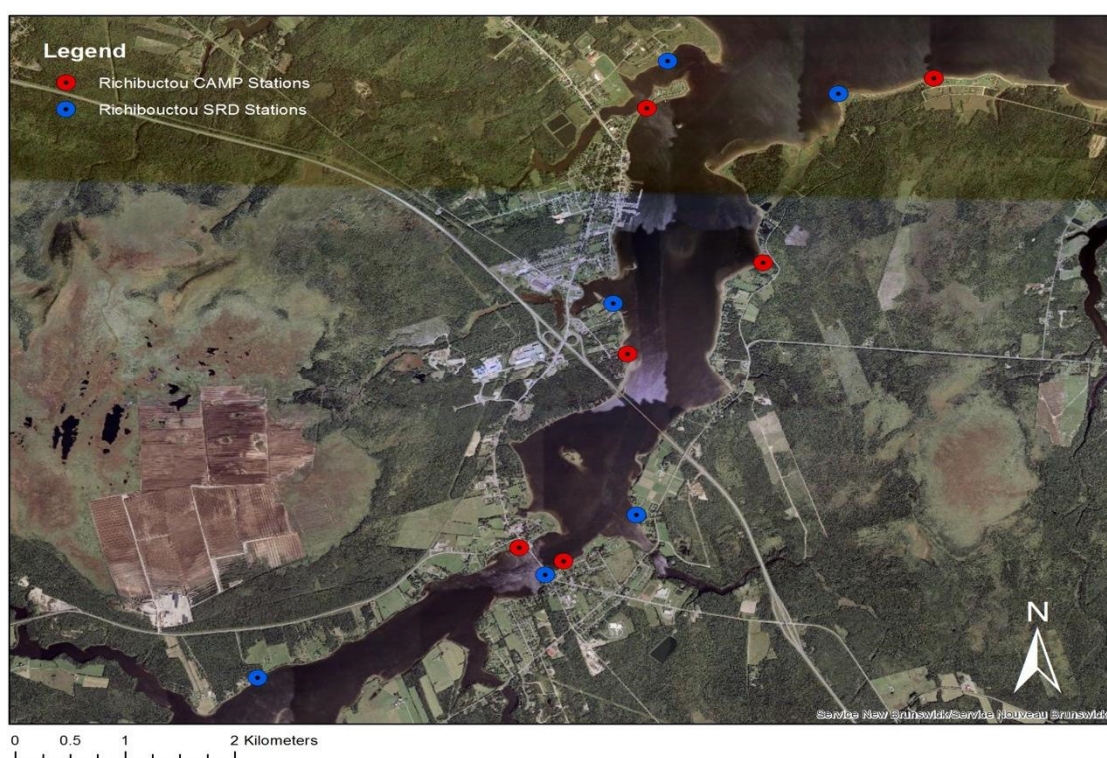

**Figure S4.** Map of Richibucto station locations.



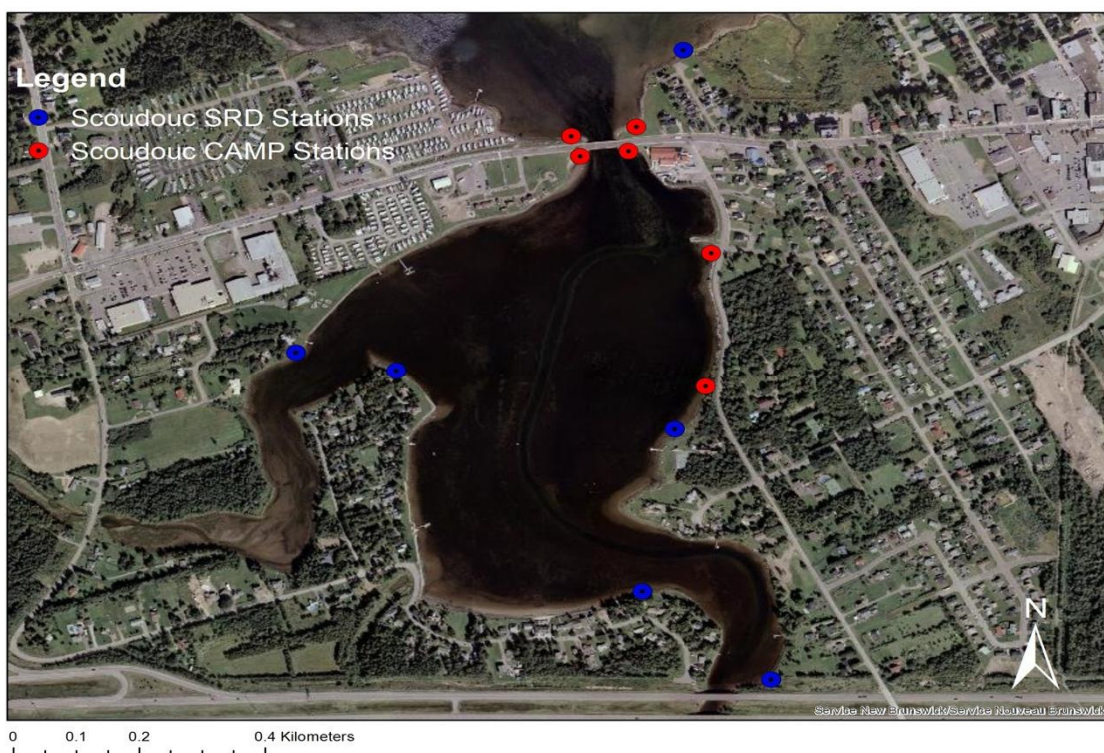

**Figure S5.** Map of Scoudouc station locations.

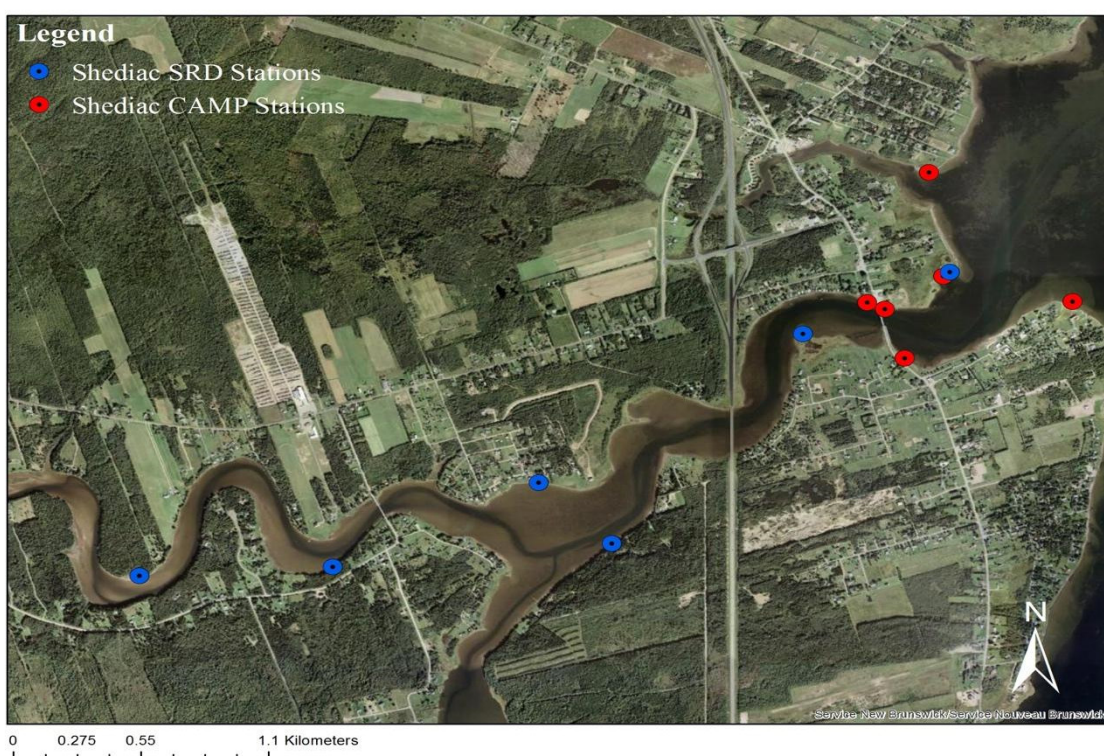

**Figure S6.** Map of Shediac station locations.



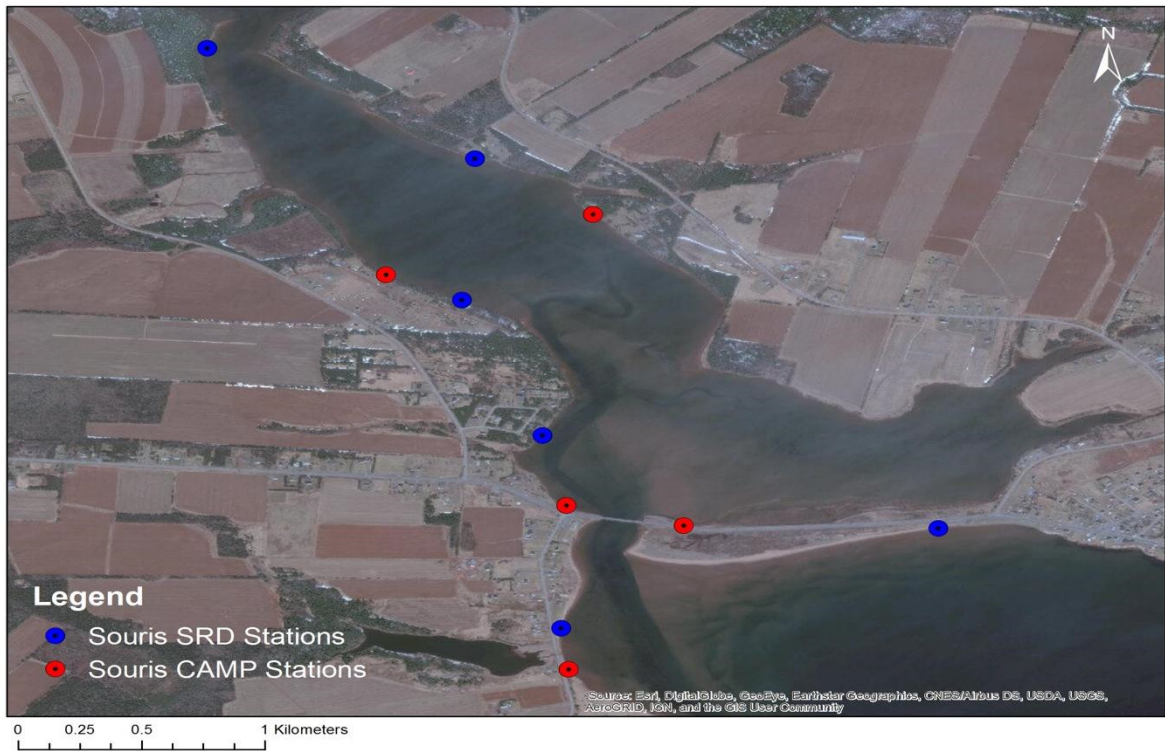

**Figure S7.** Map of Souris station locations.

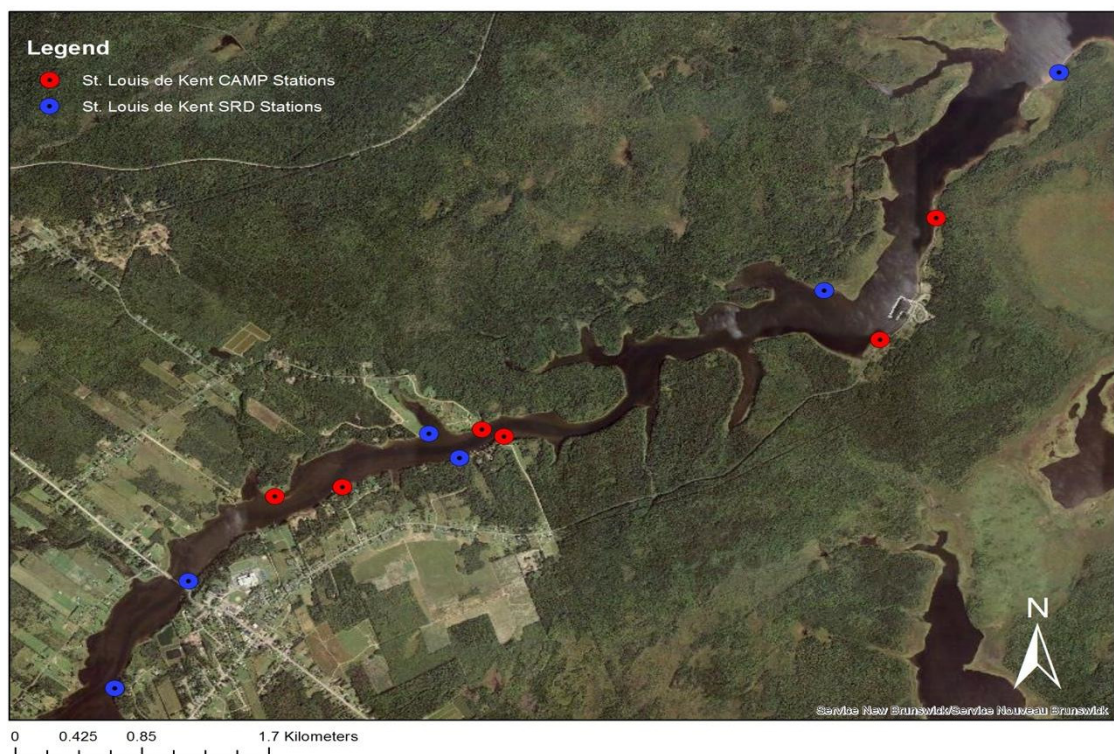

**Figure S8.** Map of St. Louis de Kent station locations.



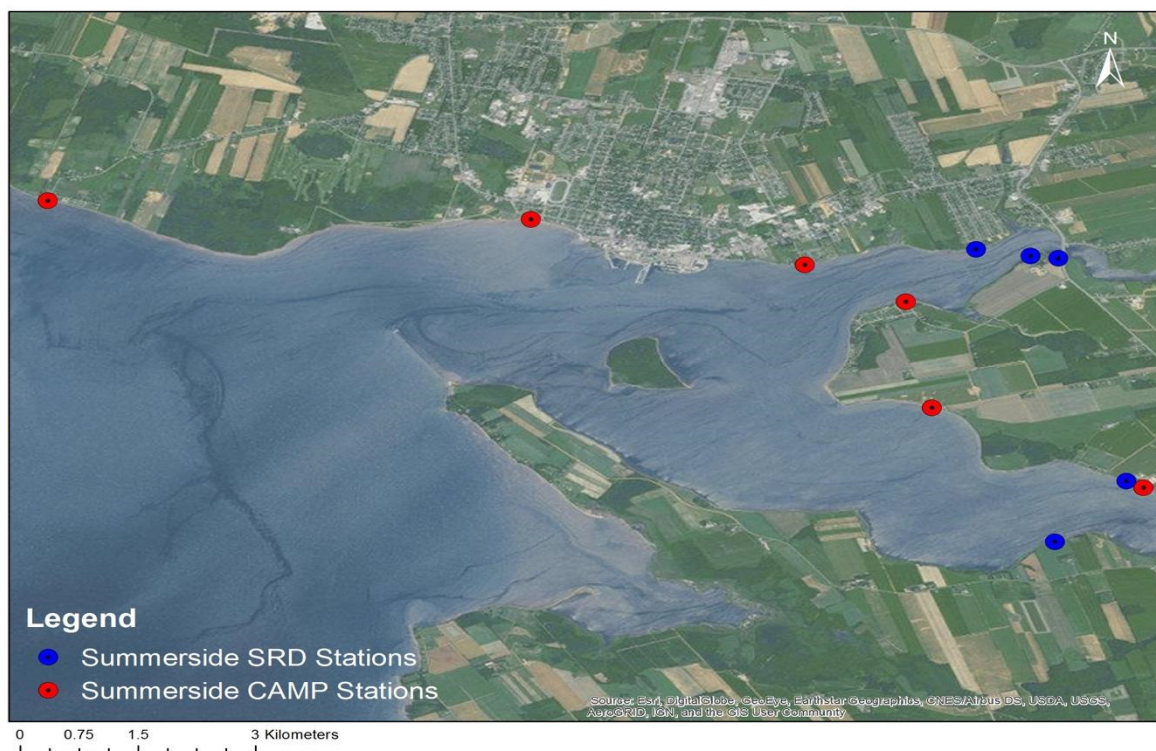

Figure S9. Map of Summerside station locations.

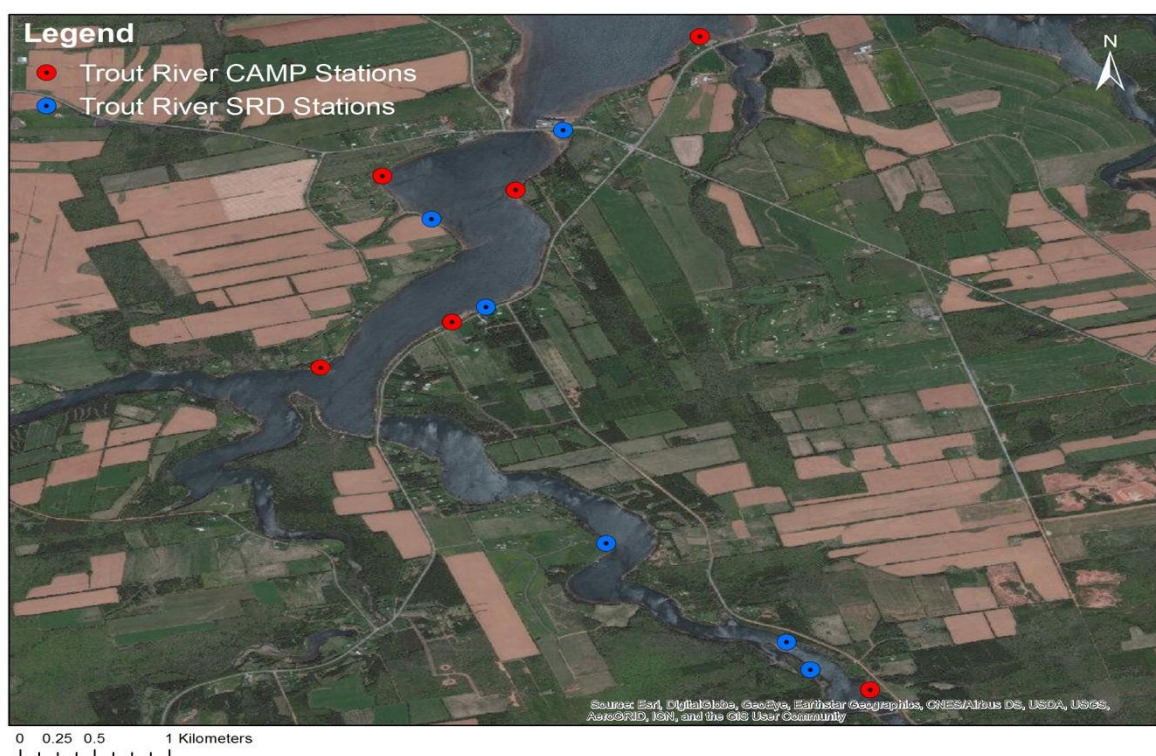

Figure S10. Map of Trout River station locations.

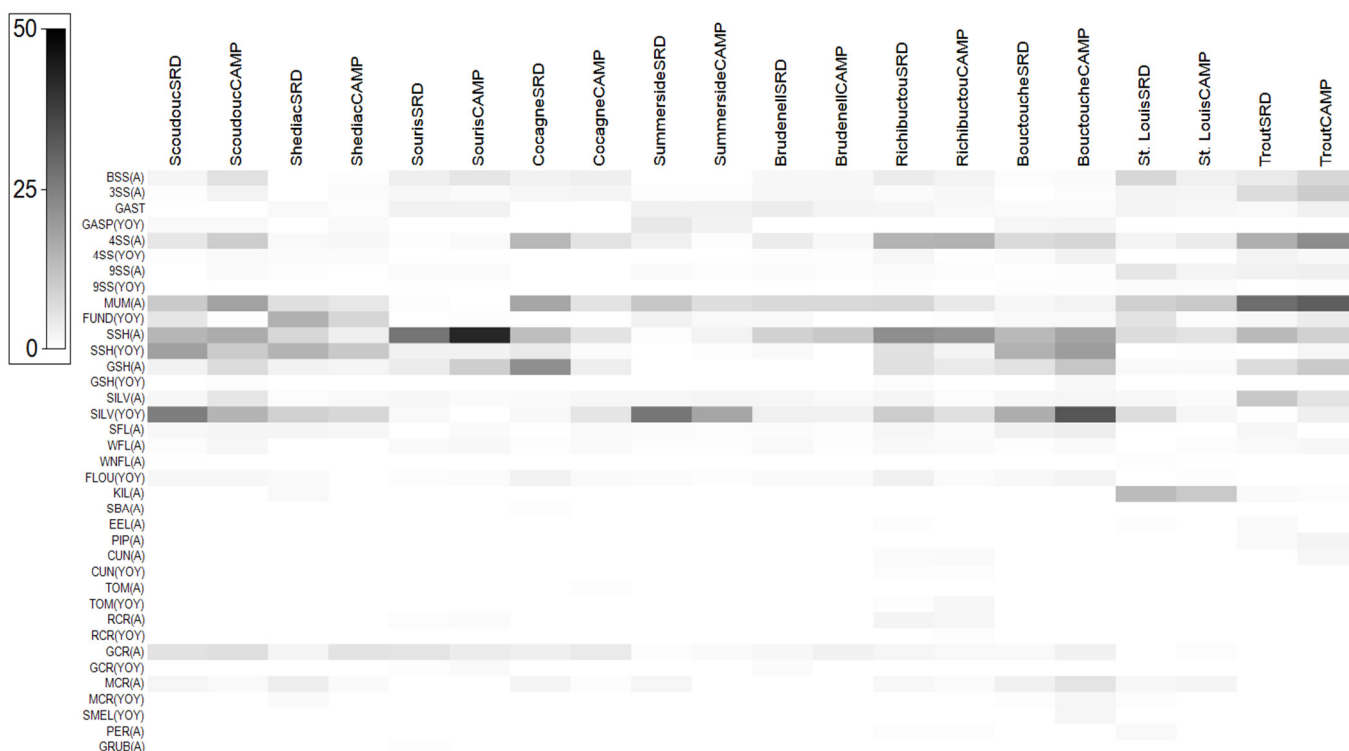

**Figure S11.** Shade plot displaying the square-root transformed abundances of each nekton species (y-axis) per sampling design (Community Aquatic Monitoring Program [CAMP] and Stratified Random Design [SRD]) for the ten estuaries (x-axis). The intensity of the shade signifies the relative abundance of each species and the contribution of each species to the similarity calculation. An (A) indicates the adult life stage of the species and YOY indicates Young-of-the-Year life stage. The species names are: BSS (blackspotted stickleback), 3SS (threespine stickleback), GAST (gasterosteus), GASP (gaspe-reau), 4SS (fourspine stickleback), 9SS (ninespine stickleback), MUM (mummichog), FUND (fundulus), SSH (sand shrimp), GSH (grass shrimp), SILV (Atlantic silverside), SFL (smooth flounder), WFL (winter flounder), WNFL (window-pane flounder), FLOU (flounder), KIL (banded killifish), SBA (striped bass), EEL (American eel), PIP (northern pipefish), CUN (cunner), TOM (Atlantic tomcod), RCR (rock crab), GCR (green crab), MCR (mud crab), SMEL (rainbow smelt), PER (white perch), and GRUB (grubby).

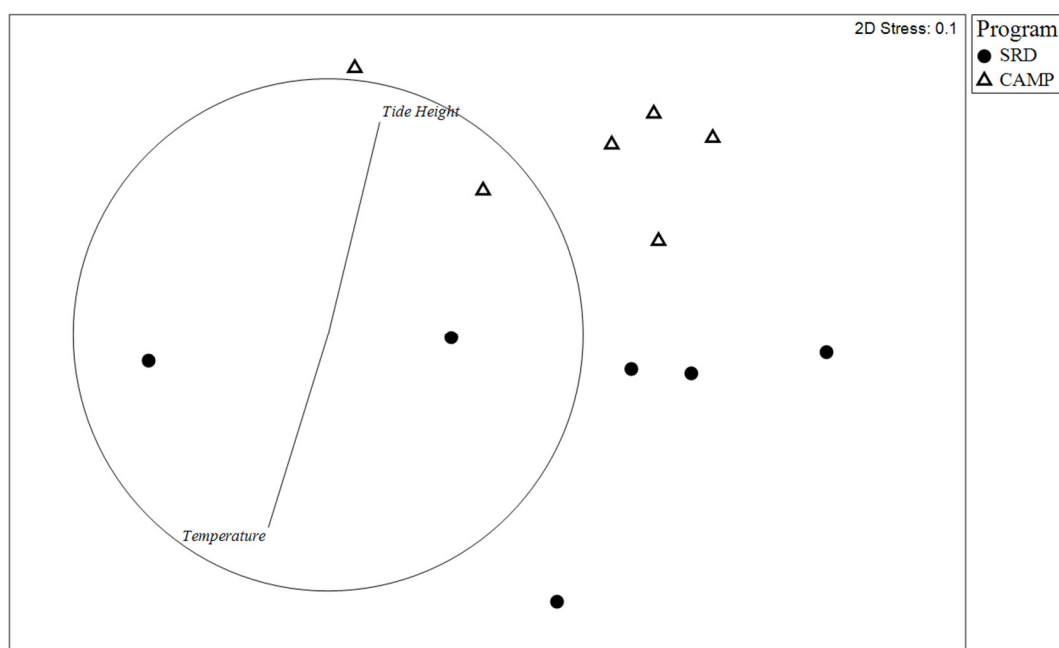

**Figure S12.** Non-metric Multidimensional Scaling ordination plot of square-root transformed nekton data collected from Cocagne Community Aquatic Monitoring Program (CAMP) and Stratified Random Design (SRD) stations. Vector overlay displays lines indicating increased temperature/tide height along that axes.

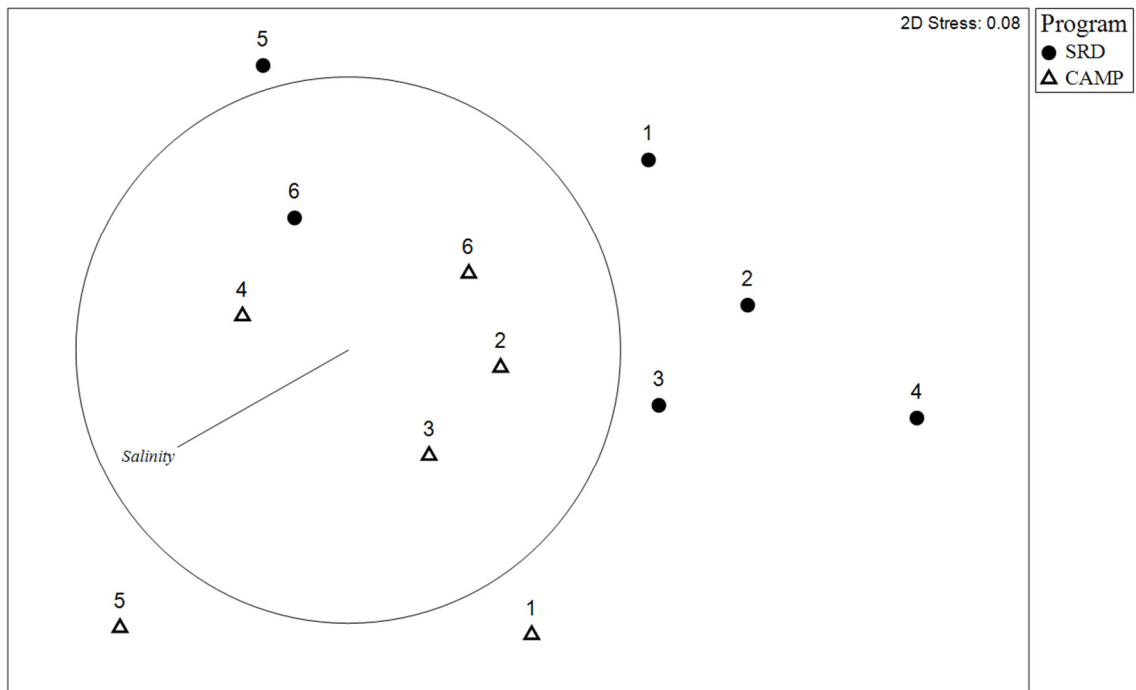

**Figure S13.** Non-metric Multidimensional Scaling ordination plot of square-root transformed nekton data collected from Shediac Community Aquatic Monitoring Program (CAMP) and Stratified Random Design (SRD) stations. Vector overlay displays a line indicating increased salinity along that axes.

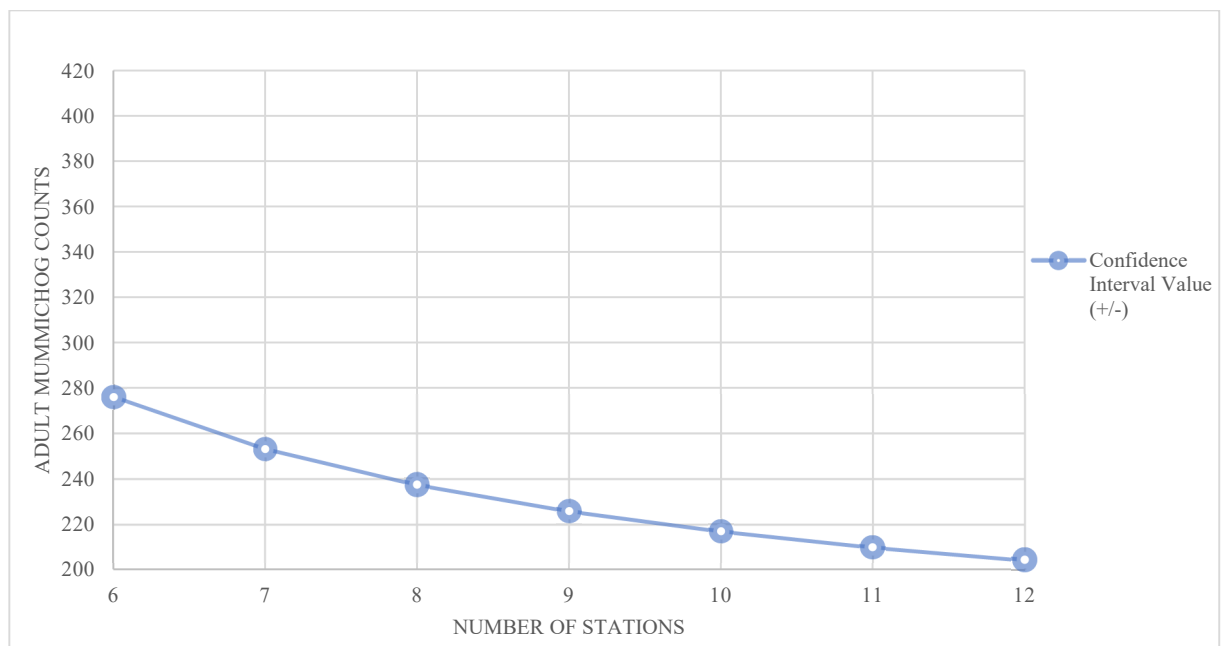

**Figure S14.** Confidence interval values (+/-) of estimates of adult mummichog abundances.

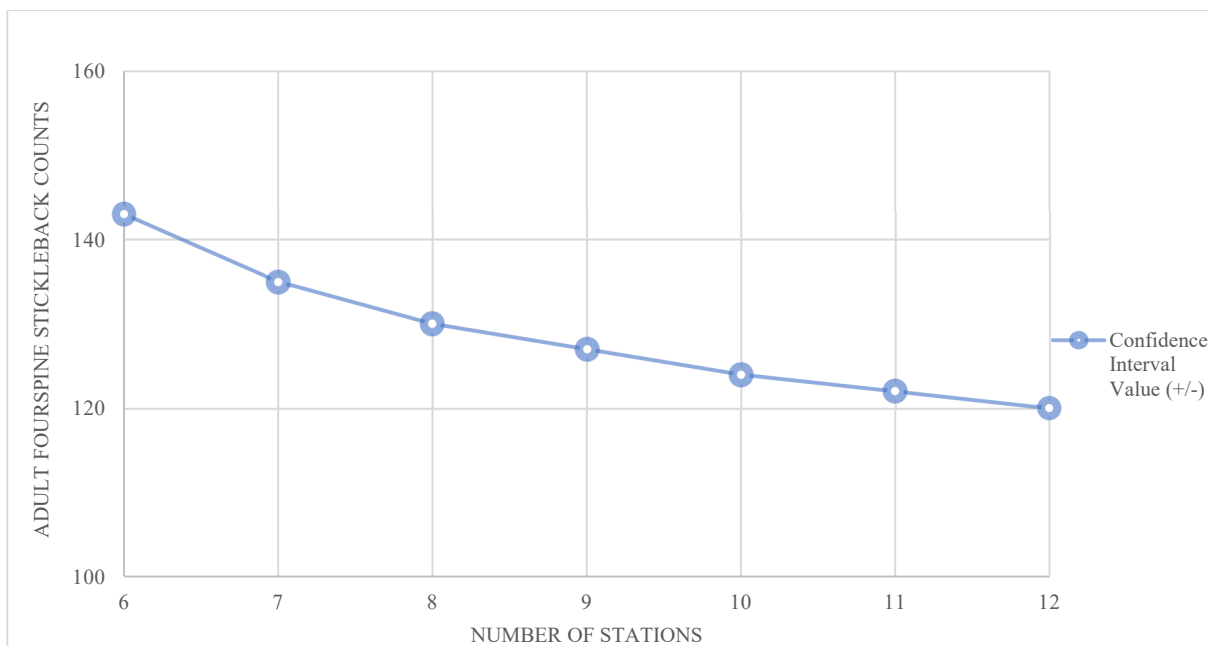

**Figure S15.** Confidence interval values (+/-) of estimates of adult fourspine stickleback abundances.

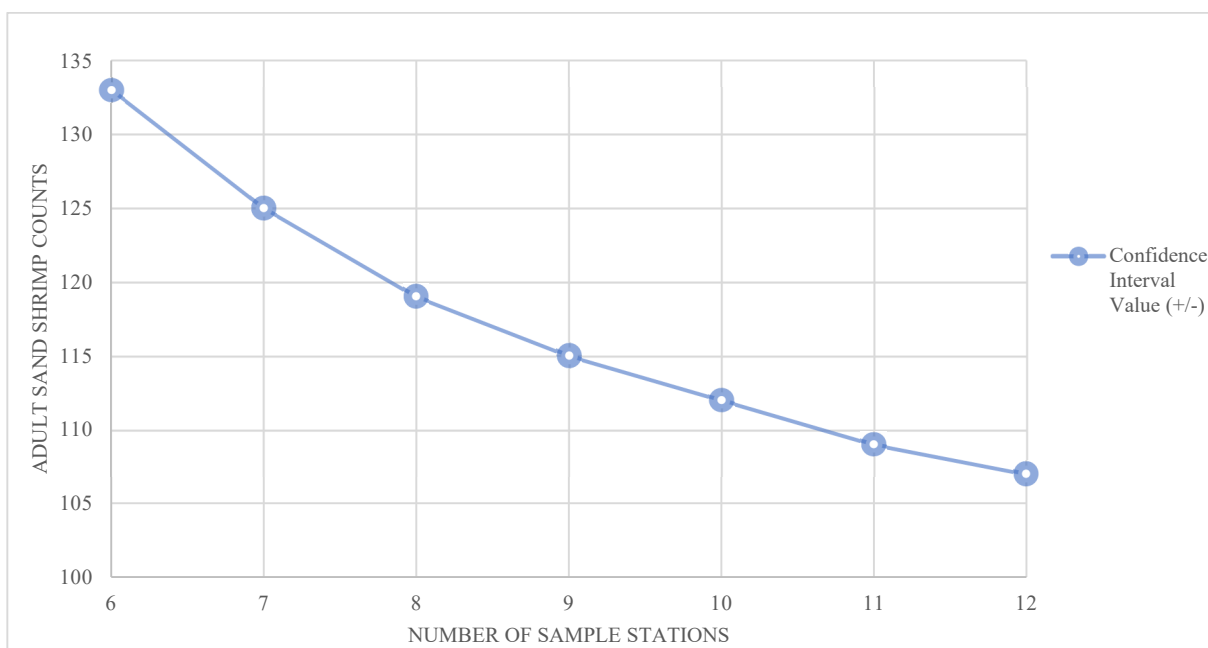

**Figure S16.** Confidence interval values (+/-) of estimates of adult sand shrimp abundances.



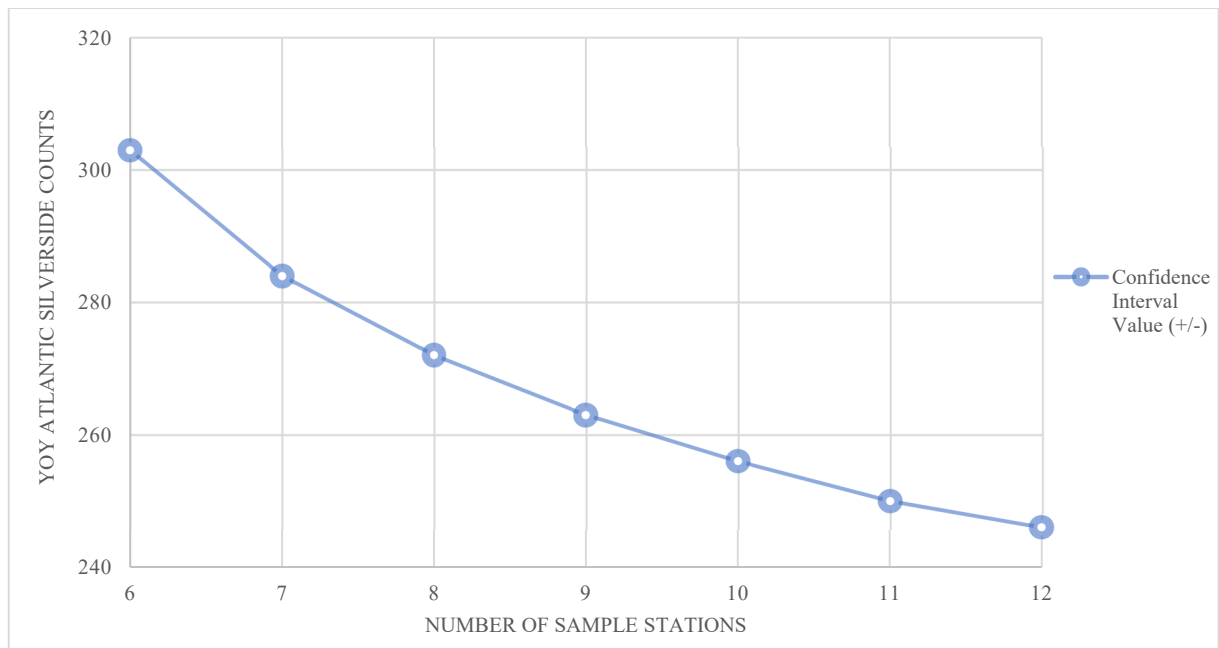

**Figure S17.** Confidence interval values (+/-) of estimates of Young-of-the-Year (YOY) Atlantic silverside abundances.

**Table S1.** Distance-based linear models (DISTLM) routine results for the analysis of the environmental variables that best describe the nekton assemblages in Cocagne.

| <b>AICc</b> | <b>R<sup>2</sup></b> | <b>F</b> | <b>P</b> | <b>Model Variables</b> |
|-------------|----------------------|----------|----------|------------------------|
| 89.76       | 0.22                 | 2.89     | 0.005    | Tide Height            |
| 90.57       | 0.17                 | 2.05     | 0.05     | Temperature            |
| 91.25       | 0.12                 | 1.38     | 0.22     | Salinity               |
| 91.35       | 0.11                 | 1.29     | 0.26     | %Rock substrate        |
| 91.54       | 0.10                 | 1.12     | 0.36     | Dissolved Oxygen       |

**Table S2.** Distance-based linear models (DISTLM) routine results for the analysis of the environmental variables that best describe the nekton assemblages in Shediac.

| <b>AICc</b> | <b>R<sup>2</sup></b> | <b>F</b> | <b>P</b> | <b>Model Variables</b> |
|-------------|----------------------|----------|----------|------------------------|
| 83.23       | 0.19                 | 2.27     | 0.04     | Salinity               |
| 83.63       | 0.17                 | 1.85     | 0.10     | %Rock substrate        |
| 83.92       | 0.14                 | 1.57     | 0.14     | Temperature            |
| 84.35       | 0.10                 | 1.16     | 0.33     | %Gravel substrate      |
| 84.45       | 0.10                 | 1.10     | 0.37     | %Mud substrate         |



**Table S3.** Permutational-MANOVA (PERMANOVA) pair-wise test among factor Site for nekton data collected from the combined data set (Community Aquatic Monitoring Program (CAMP) plus Stratified Random Design (SRD) station data).

| Sites        | <i>t</i> | Combined<br><i>P</i> |
|--------------|----------|----------------------|
| SCOU vs SHED | 2.888    | 0.0001               |
| SCOU vs SOUR | 4.153    | 0.0001               |
| SCOU vs COCA | 2.154    | 0.0002               |
| SCOU vs SUMM | 3.165    | 0.0001               |
| SCOU vs BRUD | 3.278    | 0.0001               |
| SCOU vs RICH | 2.727    | 0.0001               |
| SCOU vs BOUC | 2.162    | 0.0003               |
| SCOU vs STLO | 3.586    | 0.0001               |
| SCOU vs TROU | 4.179    | 0.0001               |
| SHED vs SOUR | 5.441    | 0.0001               |
| SHED vs COCA | 3.351    | 0.0001               |
| SHED vs SUMM | 3.523    | 0.0001               |
| SHED vs BRUD | 3.813    | 0.0001               |
| SHED vs RICH | 4.146    | 0.0001               |
| SHED vs BOUC | 2.659    | 0.0002               |
| SHED vs STLO | 4.159    | 0.0001               |
| SHED vs TROU | 6.128    | 0.0001               |
| SOUR vs COCA | 3.555    | 0.0001               |
| SOUR vs SUMM | 5.275    | 0.0001               |
| SOUR vs BRUD | 3.071    | 0.0002               |
| SOUR vs RICH | 2.756    | 0.0001               |
| SOUR vs BOUC | 3.601    | 0.0001               |
| SOUR vs STLO | 4.316    | 0.0001               |
| SOUR vs TROU | 5.797    | 0.0001               |
| COCA vs SUMM | 3.386    | 0.0001               |
| COCA vs BRUD | 1.933    | 0.0016               |
| COCA vs RICH | 1.946    | 0.0025               |
| COCA vs BOUC | 2.739    | 0.0001               |
| COCA vs STLO | 2.523    | 0.0001               |
| COCA vs TROU | 3.049    | 0.0001               |
| SUMM vs BRUD | 3.525    | 0.0001               |
| SUMM vs RICH | 4.113    | 0.0001               |
| SUMM vs BOUC | 3.340    | 0.0001               |
| SUMM vs STLO | 3.457    | 0.0001               |
| SUMM vs TROU | 4.860    | 0.0001               |
| BRUD vs RICH | 2.733    | 0.0001               |
| BRUD vs BOUC | 3.170    | 0.0001               |
| BRUD vs STLO | 2.444    | 0.0002               |
| BRUD vs TROU | 4.194    | 0.0001               |
| RICH vs BOUC | 2.373    | 0.0002               |
| RICH vs STLO | 3.379    | 0.0001               |
| RICH vs TROU | 3.663    | 0.0001               |
| BOUC vs STLO | 3.741    | 0.0001               |
| BOUC vs TROU | 4.876    | 0.0001               |
| STLO vs TROU | 3.586    | 0.0001               |

**Table S4.** Separate one-way analysis of variance (ANOVA) using the factor Site for the number of each species captured.

| <b>Species</b>                     | <b>DF</b> | <b>Sum Sq</b> | <b>Mean Sq</b> |
|------------------------------------|-----------|---------------|----------------|
| <i>Mummichog</i>                   |           |               |                |
| Site                               | 8         | 4980725       | 622591         |
| Residuals                          | 45        | 14237469      | 316388         |
| <i>Adult Fourspine Stickleback</i> |           |               |                |
| Site                               | 8         | 1334058       | 166757         |
| Residuals                          | 45        | 514836        | 11441          |
| <i>Adult Sand Shrimp</i>           |           |               |                |
| Site                               | 8         | 1158866       | 144858         |
| Residuals                          | 45        | 1484940       | 32999          |
| <i>YOY Atlantic Silverside</i>     |           |               |                |
| Site                               | 8         | 6016357       | 752045         |
| Residuals                          | 45        | 7053897       | 156753         |
